# Supplementary material for: Mapping of Two Major QTLs Controlling Flowering Time in Brassica napus Using a High-Density Genetic Map
Source: MDPI journal article supplement (doi:10.3390/plants11192635), 2022-10-07
Supplement: s1 [file s1]

## Supplementary Materials

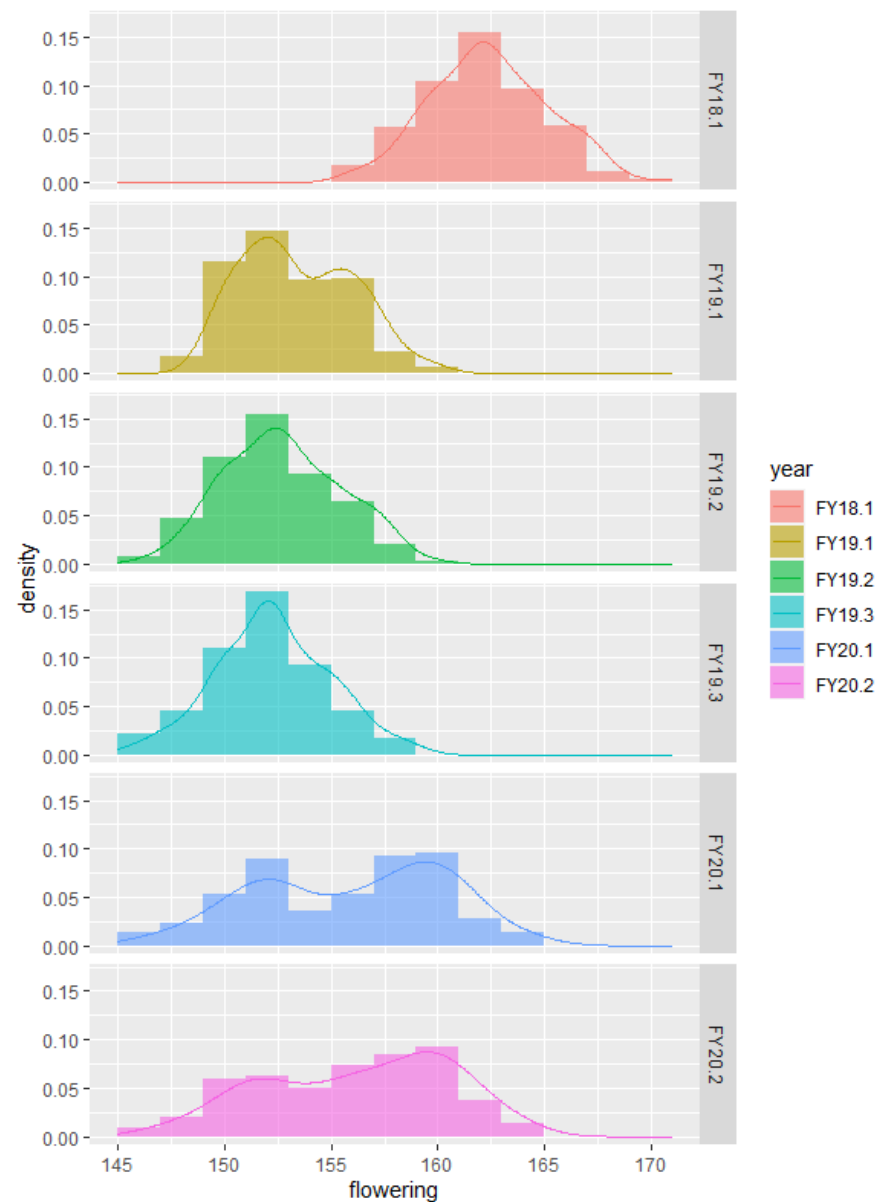

**Figure S1.** Frequency distribution of phenotypes at flowering stage in *Brassica napus* 158A-SGDH population with one replicate in 2018-2019, three replicates in 2019-2020, and two replicates in 2020-2021.

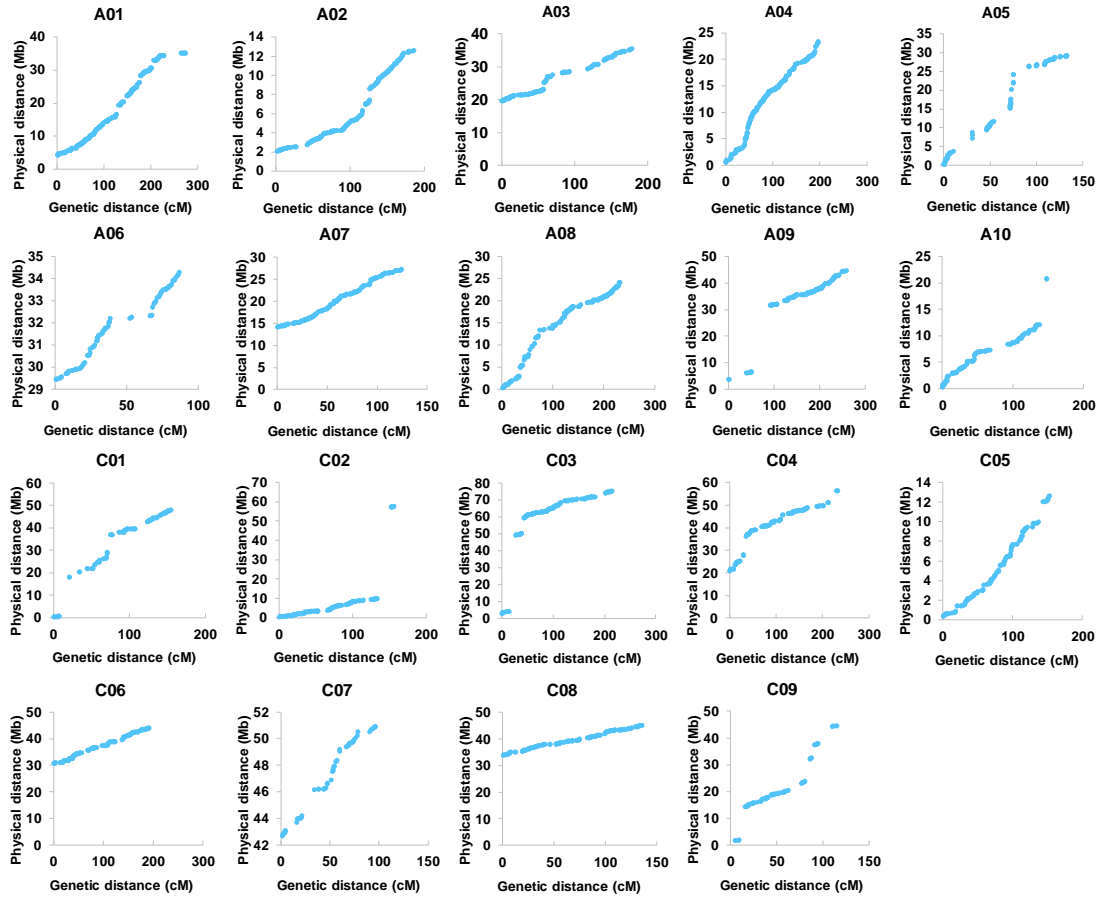

**Figure S2.** Collinearity analysis of the genetic map and physical map in *B. napus*. The abscissa represents the genetic distance of each linkage group, and the ordinatethe is the physical length of each chromosome, in which the collinearity of the marker in the genome and genetic map is represented in the form of scattered points.

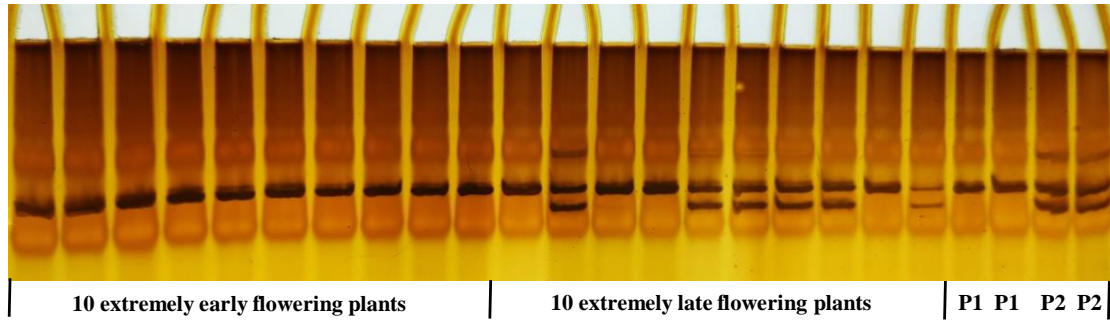

**Figure S3.** A small population of 10 extremely early flowering and 10 extremely late flowering plants were analyzed by the *cqDTF-C02* locus specific InDel marker C2-5.

**Table S8.** QTL detection of days to flowering in 158A-SGDH population.

| QTL                | Chr | Enviroment     | CI (cM)       | Peak   | LOD  | PVE (%) <sup>a</sup> | Add <sup>b</sup> |
|--------------------|-----|----------------|---------------|--------|------|----------------------|------------------|
| <i>cqDTF-A02</i>   | A02 | 2019-2020 FY-3 | 153.49-184.07 | 167.8  | 3.55 | 3.83                 | -0.56            |
|                    |     | 2020-2021FY-1  | 147.13-184.07 | 167.8  | 4.11 | 4.24                 | -0.98            |
|                    |     | 2020-2021FY-2  | 164.43-184.07 | 167.8  | 2.51 | 2.77                 | -0.77            |
| <i>cqDTF-A04</i>   | A04 | 2018-2019FY    | 97.52-117.8   | 103.71 | 2.96 | 3.86                 | 0.55             |
|                    |     | 2019-2020 FY-1 | 137.25-152.19 | 144.09 | 4.96 | 6.27                 | 0.67             |
|                    |     | 2019-2020 FY-2 | 137.25-152.19 | 144.09 | 5.08 | 7.38                 | 0.77             |
|                    |     | 2019-2020 FY-3 | 137.25-159.75 | 144.09 | 4.45 | 5.16                 | 0.63             |
|                    |     | 2020-2021FY-1  | 137.25-152.19 | 144.09 | 4.71 | 5.17                 | 1.04             |
| <i>qDTF-A06-1</i>  | A06 | 2020-2021FY-2  | 138.25-151.52 | 144.09 | 5.6  | 6.68                 | 1.16             |
|                    |     | 2020-2021FY-2  | 0.01-18.97    | 10.01  | 4.77 | 5.51                 | 1.05             |
|                    |     | 2020-2021FY-2  | 0.01-18.97    | 10.01  | 4.77 | 5.51                 | 1.05             |
| <i>qDTF-A06-2</i>  | A06 | 2019-2020 FY-2 | 34.47-51.91   | 41.06  | 3.08 | 4.43                 | 0.52             |
| <i>cqDTF-A06-3</i> | A06 | 2018-2019FY    | 19.38-50.06   | 29.41  | 5.27 | 7.63                 | 0.79             |
|                    |     | 2019-2020 FY-2 | 18.97-34.19   | 29.13  | 3.49 | 4.53                 | 0.6              |
|                    |     | 2020-2021FY-1  | 24.07-51.06   | 29.41  | 5.91 | 6.54                 | 1.16             |
| <i>cqDTF-A06-4</i> | A06 | 2019-2020 FY-1 | 74.88-85.92   | 85.92  | 4.88 | 6.29                 | 0.68             |
|                    |     | 2019-2020 FY-2 | 72.1-85.92    | 79.78  | 2.74 | 3.61                 | 0.54             |
|                    |     | 2019-2020 FY-3 | 74.88-85.92   | 85.92  | 6.7  | 8.28                 | 0.8              |
| <i>cqDTF-A07-1</i> | A07 | 2019-2020 FY-1 | 105.47-119.66 | 111.54 | 7.3  | 9.57                 | 0.82             |
|                    |     | 2019-2020 FY-2 | 104.94-117.69 | 108.16 | 4.56 | 6.61                 | 0.71             |
|                    |     | 2019-2020 FY-3 | 97.46-124.13  | 114.91 | 3.93 | 4.07                 | 0.55             |
|                    |     | 2020-2021FY-1  | 104.69-117.46 | 108.16 | 8.23 | 9.23                 | 1.37             |
|                    |     | 2020-2021FY-2  | 105.47-112.66 | 108.16 | 6.17 | 7.33                 | 1.19             |
| <i>cqDTF-A07-2</i> | A07 | 2019-2020 FY-3 | 65.94-95.5    | 73.81  | 3.53 | 3.7                  | 0.53             |
| <i>qDTF-A08-1</i>  | A08 | 2019-2020 FY-1 | 0.01-24.75    | 2.01   | 3.37 | 3.95                 | 0.52             |
| <i>qDTF-A08-2</i>  | A08 | 2019-2020 FY-1 | 25.64-46.58   | 35.73  | 3.37 | 4.22                 | 0.55             |
| <i>qDTF-A08-3</i>  | A08 | 2019-2020 FY-1 | 47.86-91.57   | 70.17  | 2.87 | 3.31                 | 0.48             |
| <i>qDTF-A08-4</i>  | A08 | 2019-2020 FY-2 | 81.48-102.15  | 90.48  | 3.16 | 4.6                  | 0.6              |

|                    |     |                |               |        |       |       |       |
|--------------------|-----|----------------|---------------|--------|-------|-------|-------|
| <i>qDTF-A09-1</i>  | A09 | 2019-2020 FY-3 | 212-230.18    | 220.15 | 2.91  | 3.03  | 0.47  |
| <i>cqDTF-A09-2</i> | A09 | 2018-2019FY    | 231.14-258.24 | 251.44 | 3.03  | 3.93  | 0.57  |
|                    |     | 2019-2020 FY-3 | 230.58-258.24 | 233.95 | 2.8   | 3.02  | 0.48  |
| <i>qDTF-C01-1</i>  | C01 | 2019-2020 FY-2 | 0.01-20.89    | 8.04   | 2.6   | 3.65  | -0.55 |
| <i>qDTF-C01-2</i>  | C01 | 2018-2019FY    | 107.26-139.54 | 130.07 | 2.96  | 3.86  | 0.55  |
| <i>cqDTF-C02</i>   | C02 | 2018-2019FY    | 12.43-33.54   | 23.68  | 8.86  | 13.54 | 1.07  |
|                    |     | 2019-2020 FY-1 | 20.31-41.86   | 34.1   | 10.95 | 15.12 | 1.06  |
|                    |     | 2019-2020 FY-2 | 18.06-33.54   | 33.54  | 10    | 15.67 | 1.12  |
|                    |     | 2019-2020 FY-3 | 19.46-38.48   | 31.56  | 11.85 | 15.32 | 1.1   |
|                    |     | 2020-2021FY-1  | 30.72-51.43   | 40.86  | 22.92 | 32.04 | 2.59  |
|                    |     | 2020-2021FY-2  | 30.72-51.43   | 40.86  | 21.77 | 31.42 | 2.52  |
| <i>cqDTF-C04-1</i> | C04 | 2020-2021FY-1  | 32.59-47.22   | 46.09  | 2.7   | 2.7   | 1.06  |
|                    |     | 2020-2021FY-2  | 33.59-76.33   | 46.09  | 2.94  | 3.17  | 1.11  |
| <i>cqDTF-C04-2</i> | C04 | 2020-2021FY-1  | 69-14-119.1   | 88.82  | 3.03  | 3.1   | 1.11  |
|                    |     | 2020-2021FY-2  | 76.73-118.1   | 88.82  | 2.97  | 3.28  | 1.12  |
| <i>cqDTF-C05</i>   | C05 | 2019-2020 FY-2 | 0.01-46.11    | 31.62  | 2.85  | 3.74  | 0.54  |
|                    |     | 2019-2020 FY-3 | 0.01-61.83    | 37.52  | 2.59  | 2.76  | 0.46  |
|                    |     | 2020-2021FY-2  | 0.01-66       | 31.62  | 2.53  | 2.74  | 0.73  |
| <i>cqDTF-C06</i>   | C06 | 2018-2019FY    | 38.84-44.18   | 42.05  | 7.91  | 11.79 | 0.99  |
|                    |     | 2019-2020 FY-1 | 31.65-44.86   | 42.05  | 9.51  | 12.64 | 0.93  |
|                    |     | 2019-2020 FY-2 | 3.38-28.99    | 18.67  | 8.09  | 12.46 | 0.99  |
|                    |     | 2019-2020 FY-3 | 39.52-44.18   | 42.05  | 12.6  | 16.13 | 1.11  |
|                    |     | 2020-2021FY-1  | 31.36-45.42   | 41.37  | 5.7   | 6.23  | 1.12  |
|                    |     | 2020-2021FY-2  | 31.36-46.55   | 41.49  | 5.31  | 6.07  | 1.08  |
| <i>cqDTF-C09</i>   | C09 | 2018-2019FY    | 75.74-105.07  | 90.07  | 4.47  | 6.45  | 0.74  |
|                    |     | 2019-2020 FY-1 | 63.37-105.98  | 80.74  | 3.99  | 4.54  | 0.58  |
|                    |     | 2019-2020 FY-3 | 75.74-104.07  | 88.66  | 4.46  | 5.13  | 0.64  |
|                    |     | 2020-2021FY-1  | 60.37-107.98  | 78.74  | 3.15  | 3.38  | 0.86  |
|                    |     | 2020-2021FY-2  | 62.37-106.98  | 88.66  | 3.04  | 3.13  | 0.81  |

---

<sup>a</sup> Proportion of the phenotypic variation explained by the QTL; <sup>b</sup> + and – indicate the direction of the additive effect.
